# Supplementary material for: Bile Acids and Risk of Adverse Cardiovascular Events and All-Cause Mortality in Patients with Acute Coronary Syndrome
Source: MDPI journal article supplement (doi:10.3390/nu16071062), 2024-04-05
Supplement: s1 [file s1]

### Supplementary file

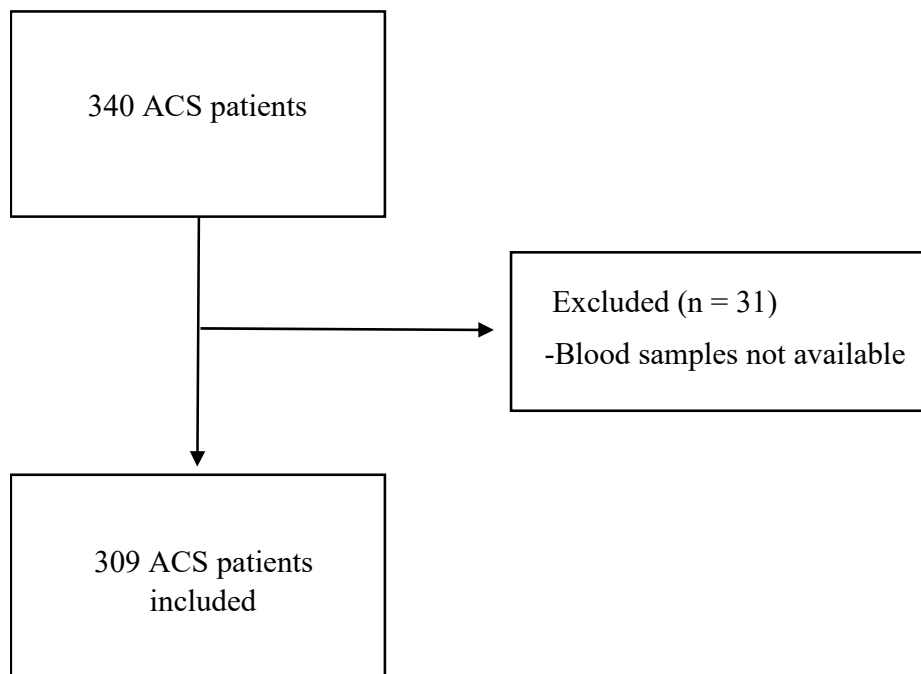

**Supplementary Figure S1.** Flowchart of study participants.

ACS, acute coronary syndrome.

**Supplementary Table S1.** List of metabolites identified in the LC-MS/MS method.

| <b>Bile acid</b> | <b>HMDB_ID</b> | <b>Retention time (min)</b> | <b>Precursor ion (m/z)</b> | <b>Product ion (m/z)</b> |
|------------------|----------------|-----------------------------|----------------------------|--------------------------|
| CA               | HMDB0000619    | 2.001                       | 407.3                      | 343                      |
|                  |                |                             | 407.3                      | 345.3                    |
| CA d5            | -              | 1.982                       | 412.3                      | 348                      |
|                  |                |                             | 412.3                      | 350.3                    |
| CDCA             | HMDB00518      | 3.928                       | 451.3                      | 391.3                    |
|                  |                |                             | 451.3                      | 373.2                    |
| DCA              | HMDB00626      | 4.561                       | 391.3                      | 345.1                    |
|                  |                |                             | 391.3                      | 343.2                    |
| GCA              | HMDB0000138    | 2.386                       | 464.3                      | 74                       |
|                  |                |                             | 464.3                      | 402.3                    |
| GCA d4           | -              | 2.376                       | 468.3                      | 74                       |
|                  |                |                             | 468.3                      | 406.3                    |
| GCDCA            | HMDB0000637    | 4.74                        | 448.3                      | 74                       |
|                  |                |                             | 448.3                      | 386.3                    |
| GCDCA d4         | -              | 4.719                       | 452.3                      | 74                       |
|                  |                |                             | 452.3                      | 390.3                    |
| GDCA             | HMDB0242414    | 5.375                       | 448.3                      | 74                       |
|                  |                |                             | 448.3                      | 402.3                    |
| GDCA d4          | -              | 5.345                       | 452.3                      | 74                       |
|                  |                |                             | 452.3                      | 406.3                    |
| GUDCA            | HMDB0000708    | 2.076                       | 448.3                      | 74                       |
|                  |                |                             | 448.3                      | 386.3                    |
|                  |                |                             | 448.3                      | 448.3                    |
| GLCA             | HMDB0000698    | 9.208                       | 432.3                      | 74                       |
|                  |                |                             | 432.3                      | 388.3                    |
| GLCA d4          | -              | 9.197                       | 436.3                      | 74                       |
|                  |                |                             | 436.3                      | 392.3                    |
| GUDCA d4         | -              | 2.064                       | 452.3                      | 74                       |
|                  |                |                             | 452.3                      | 390.3                    |
| HDCA             | -              | 2.169                       | 451.3                      | 391.3                    |
|                  |                |                             | 451.3                      | 59                       |
| LCA              | HMDB00761      | 8.547                       | 435.3                      | 375.2                    |
|                  |                |                             | 435.3                      | 58.8                     |
| TCA              | HMDB00036      | 2.762                       | 514.3                      | 124                      |
|                  |                |                             | 514.3                      | 79.9                     |
| TCA d4           | -              | 2.78                        | 518.3                      | 79.9                     |
|                  |                |                             | 518.3                      | 124                      |
| TCDCA            | HMDB00951      | 5.576                       | 498.3                      | 79.9                     |
|                  |                |                             | 498.3                      | 124.1                    |

|          |             |       |                         |                      |
|----------|-------------|-------|-------------------------|----------------------|
| TCDCA d4 | -           | 5.556 | 502.3<br>502.3          | 79.9<br>124.1        |
| TDCA     | HMDB00896   | 6.21  | 498.3<br>498.3          | 79.9<br>124.1        |
| TDCA d4  | -           | 6.173 | 502.3<br>502.3          | 79.9<br>124.1        |
| TLCA     | HMDB0000722 | 9.801 | 482.3<br>482.3          | 80<br>124            |
| TLCA d4  | -           | 9.773 | 486.3<br>486.3          | 80<br>124            |
| TUDCA d4 | -           | 2.507 | 502.3<br>502.3          | 80<br>124.1          |
| TUDCA    | HMDB00874   | 2.526 | 498.3<br>498.3<br>498.3 | 124.1<br>80<br>498.3 |
| UDCA     | HMDB00946   | 1.752 | 451.3<br>451.3          | 391.3<br>59          |

Abbreviations: CA, cholic acid; CI, confidence interval; CDCA, chenodeoxycholic acid; TCA, taurocholic acid; DCA, deoxycholic acid; GCDCA, glycochenodeoxycholic acid; GCA, glycocholic acid; GDCA, glycodeoxycholic acid; GLCA, glycolithocholic acid; GUDCA, glycoursodeoxycholic acid; HDCA, hyodeoxycholic acid; LCA, lithocholic acid; TCDCA, taurochenodeoxycholic acid; TDCA, taurodeoxycholic acid; TLCA, tauroolithocholic acid; TUDCA, tauroursodeoxycholic acid; UDCA, ursodeoxycholic acid.

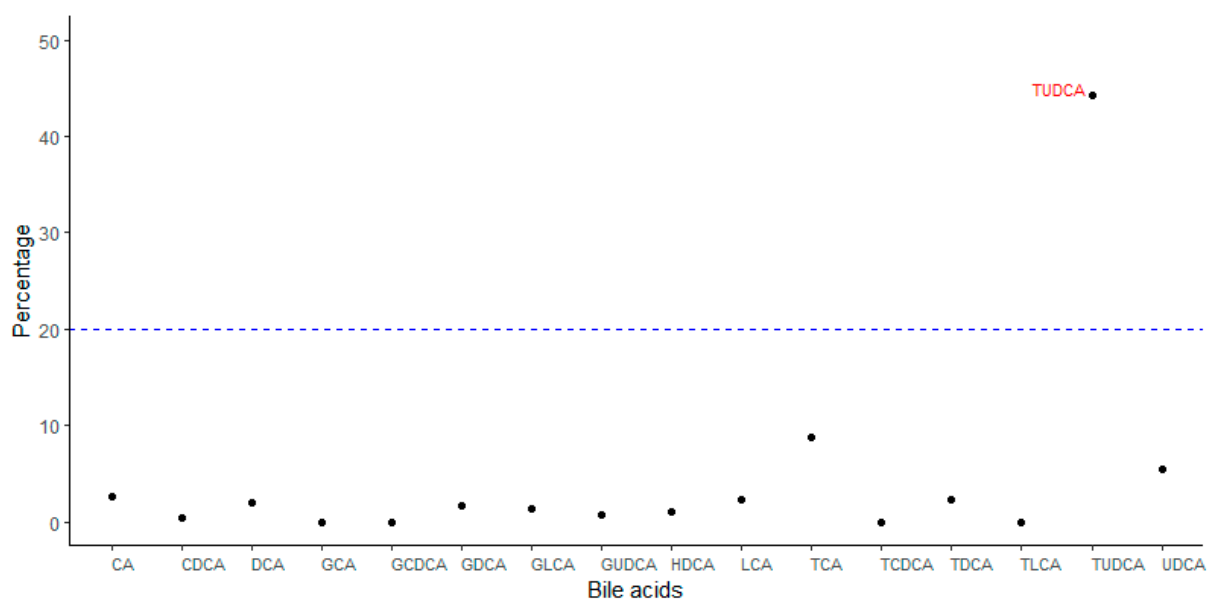

**Supplementary Figure S2.** Plot of the 16 bile acids according to the percentage of missingness in 309 patients with ACS. Abbreviations: CA, cholic acid; CI, confidence interval; CDCA, chenodeoxycholic acid; TCA, taurocholic acid; DCA, deoxycholic acid; GCDCA, glycochenodeoxycholic acid; GCA, glycocholic acid; GDCA, glycocodeoxycholic acid; GLCA, glycolithocholic acid; GUDCA, glyoursodeoxycholic acid; HDCA, hyodeoxycholic acid; LCA, lithocholic acid; TCDCA, taurochenodeoxycholic acid; TDCA, taurodeoxycholic acid; TLCA, tauroolithocholic acid; TUDCA, taoursodeoxycholic acid; UDCA, ursodeoxycholic acid.

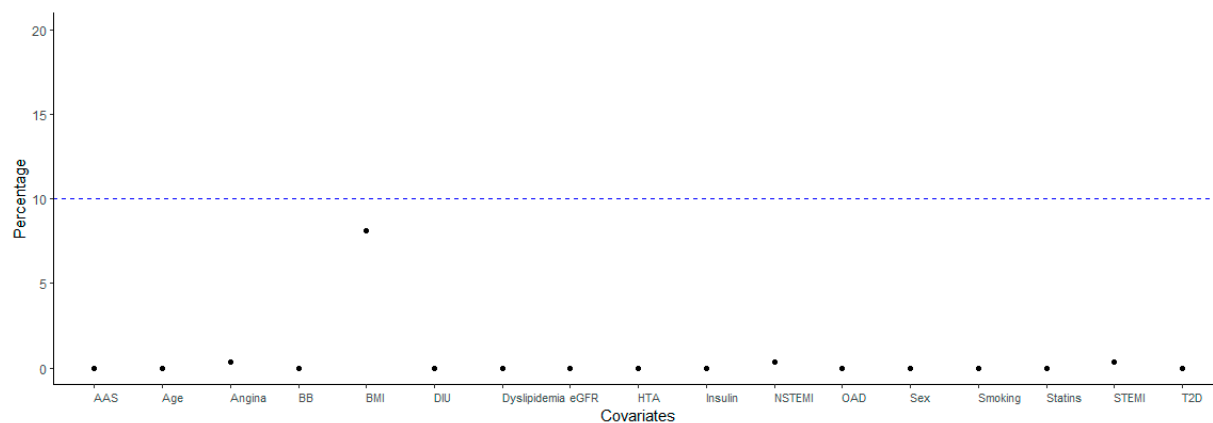

**Supplementary Figure S3.** Plot of the covariates according to the percentage of missingness in 309 patients with ACS. Abbreviations: AAS, aspirin; BB, beta-blockers drugs; BMI, body mass index; DIU, diuretics; eGFR, estimated glomerular filtration rate; HTA, hypertension; NSTEMI, non- ST-segment elevation myocardial infarction; OAD, oral antidiabetic drugs; STEMI, ST-segment elevation myocardial infarction; T2D, type 2 diabetes.

**Supplementary Figure S4.** Density plots comparing observed and imputed data.

**A.**

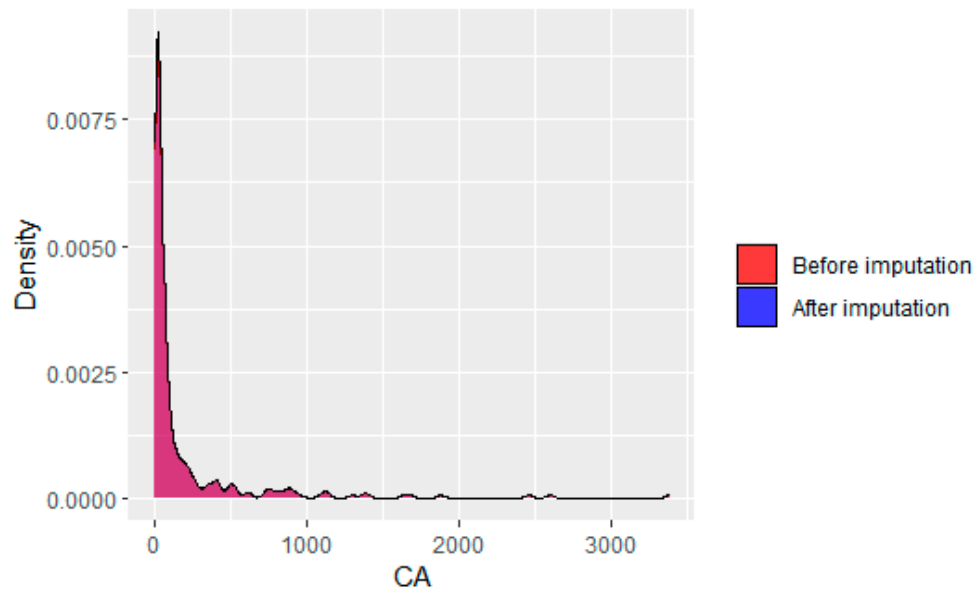

Abbreviations: CA, cholic acid.

**B.**

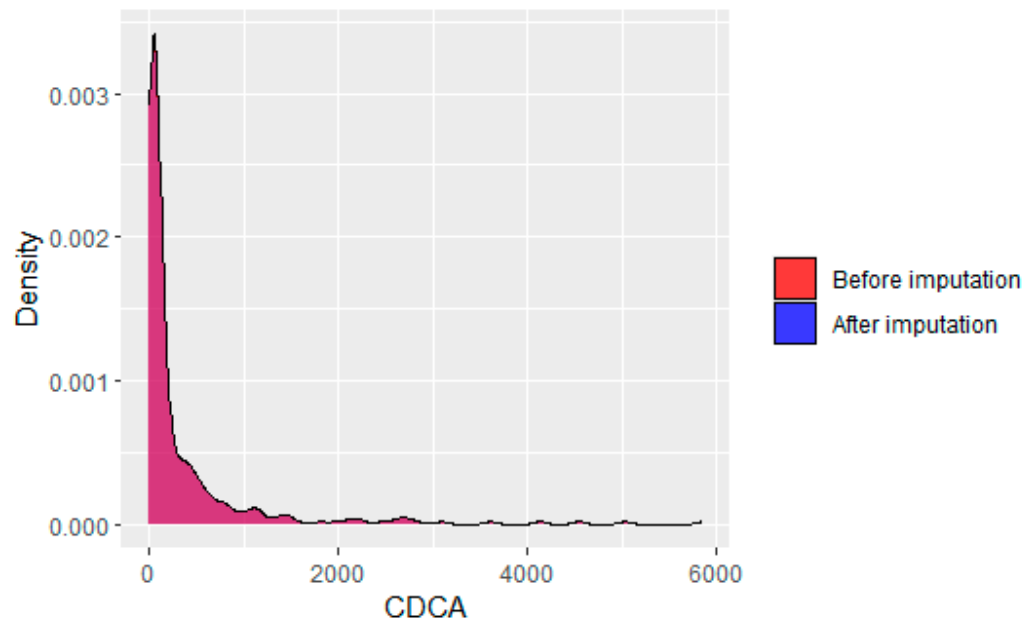

Abbreviations: CDCA, chenodeoxycholic acid.

**C.**

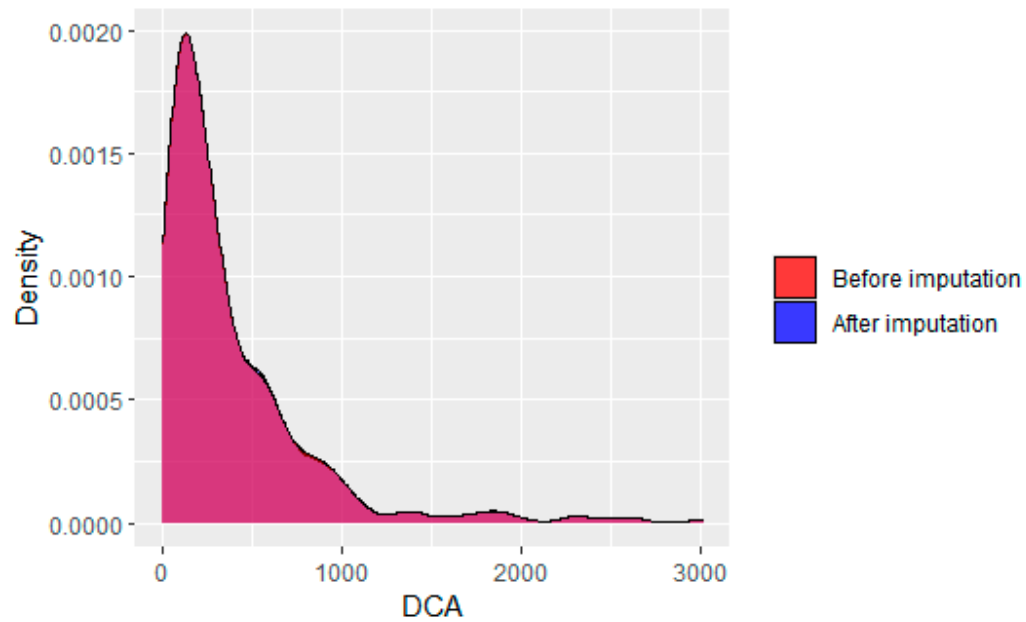

Abbreviations: DCA, deoxycholic acid

**D.**

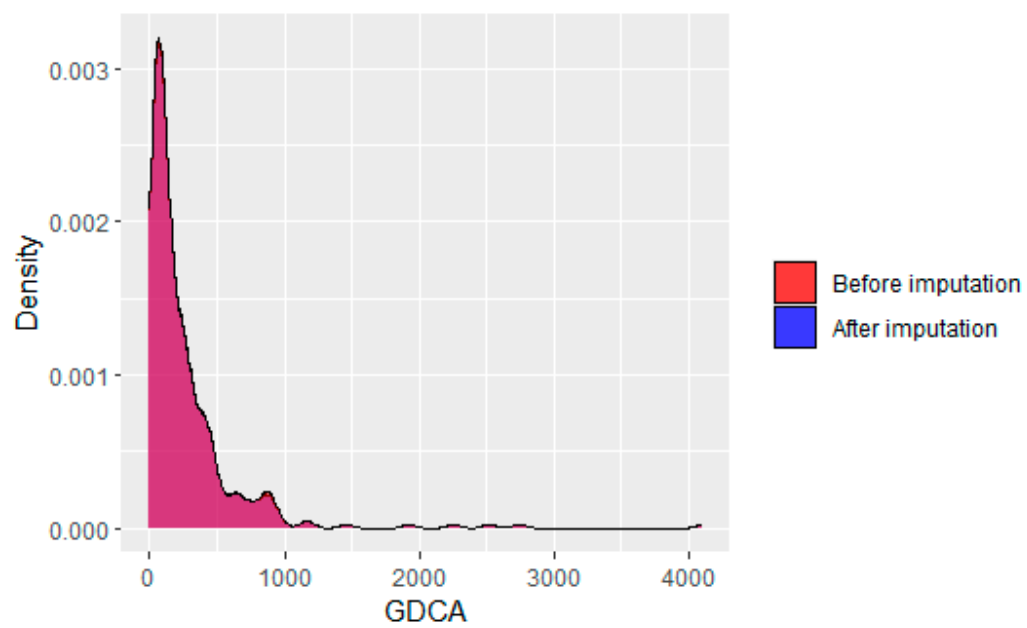

Abbreviations: GDCA, glycodeoxycholic acid.

E.

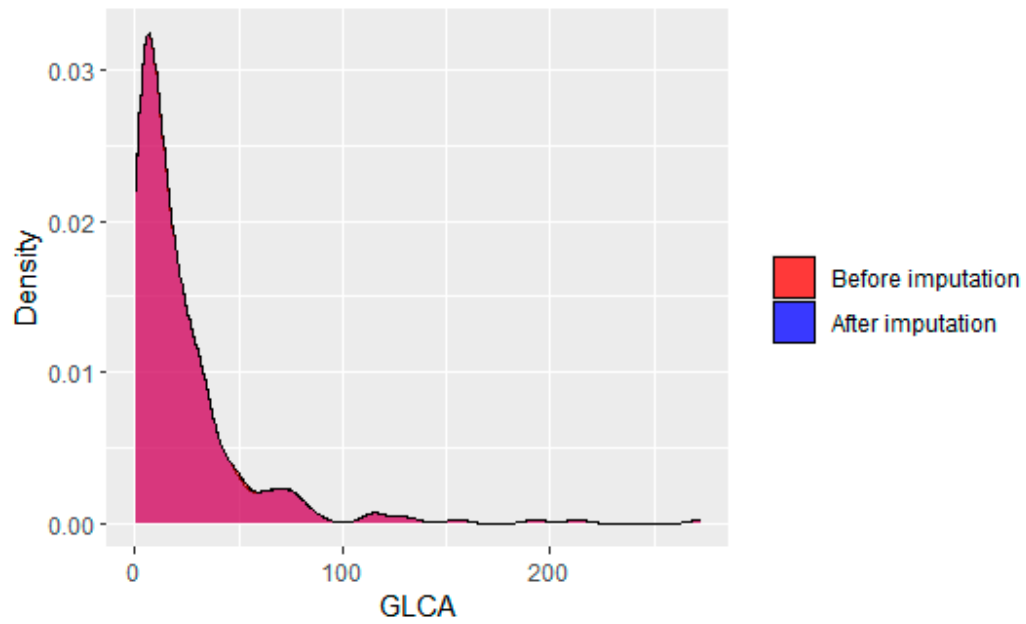

Abbreviations: GLCA, glycolithocholic acid

F.

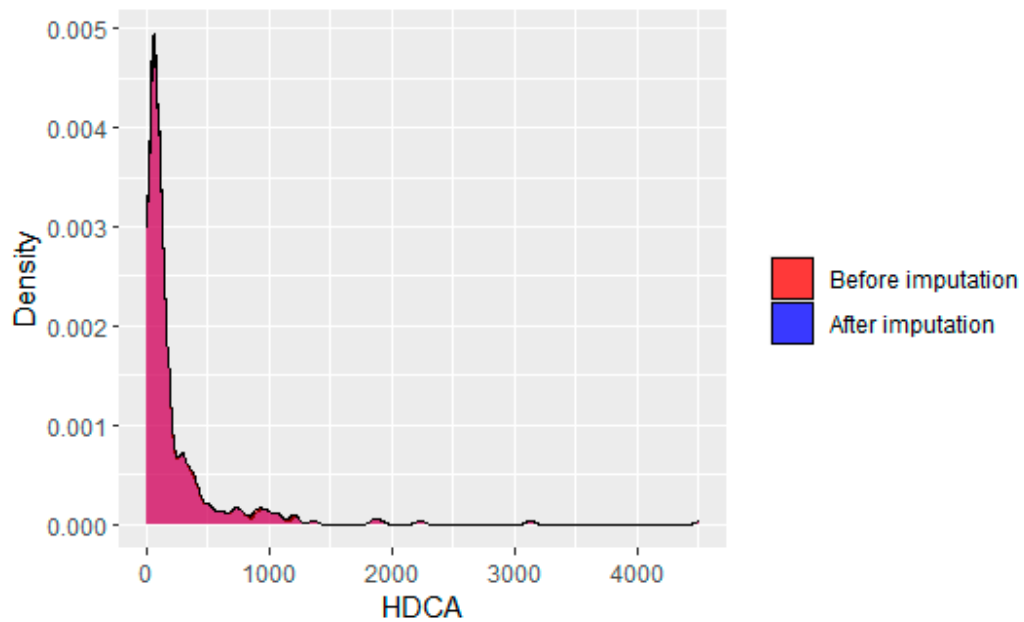

Abbreviations: HDCA, hyodeoxycholic acid.



**G.**

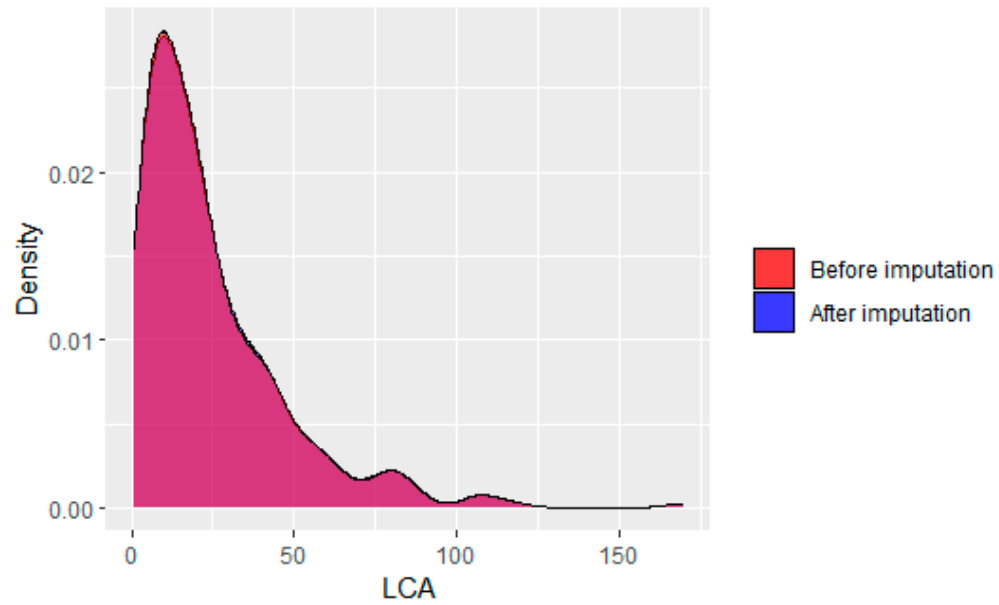

Abbreviations: LCA, lithocholic acid.

**H.**

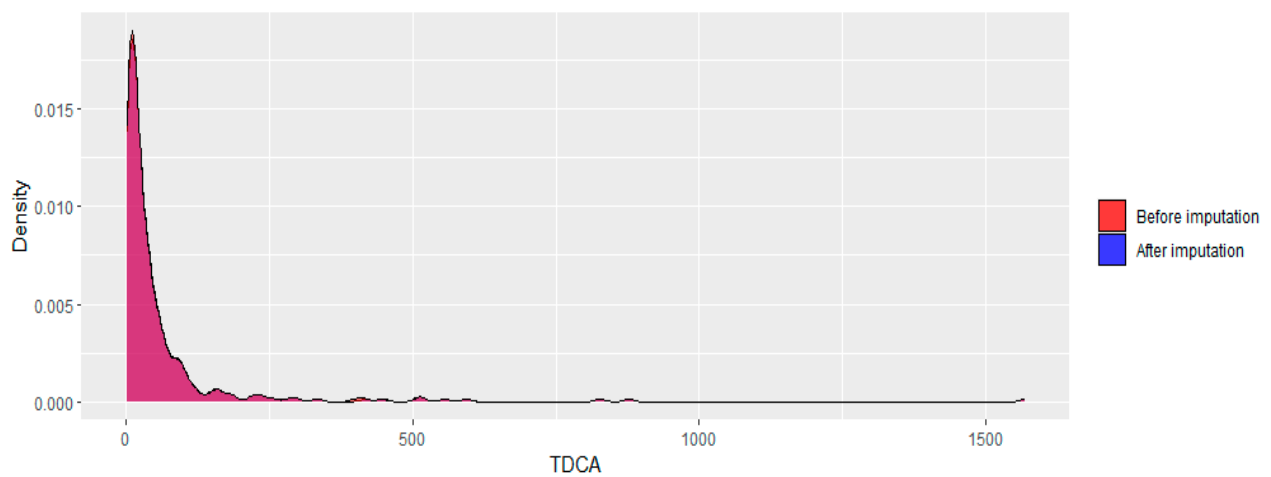

Abbreviations: TDCA, taurodeoxycholic acid.

**I.**

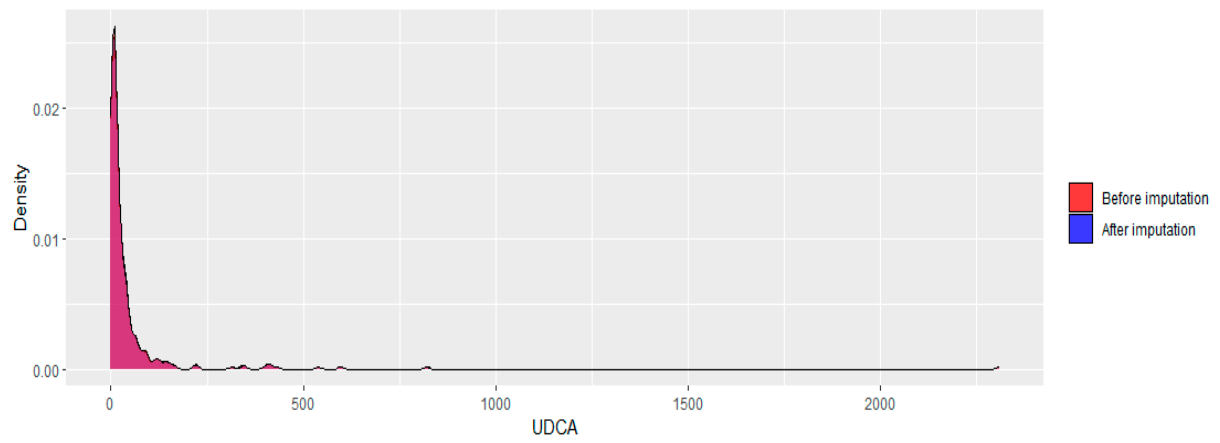

Abbreviations: UDCA, ursodeoxycholic acid.

**J.**

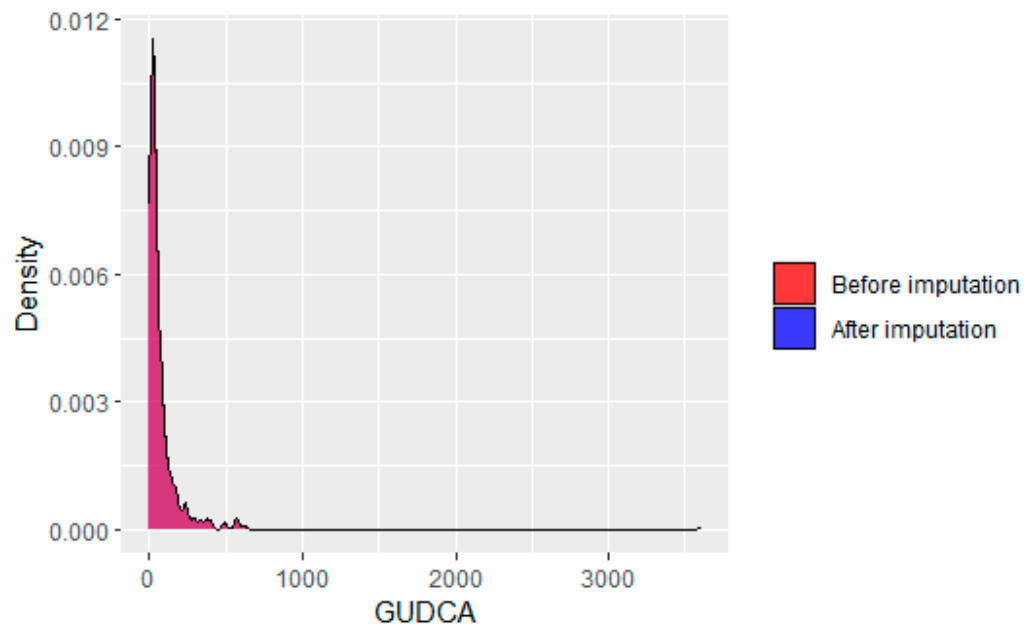

Abbreviations: GUDCA, glycoursodeoxycholic acid.

**K.**

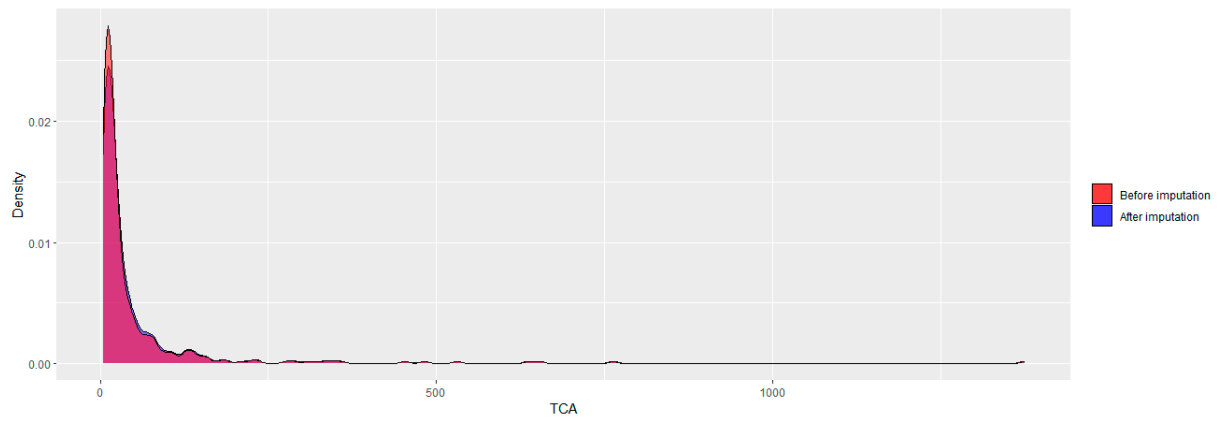

Abbreviations: TCA, taurocholic acid.

**L**

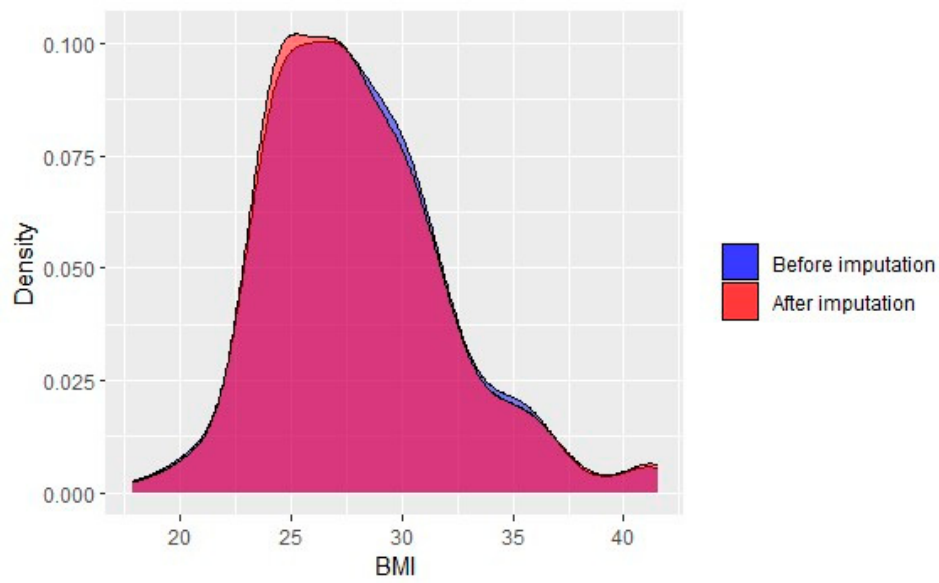

Abbreviations: BMI, body mass index.

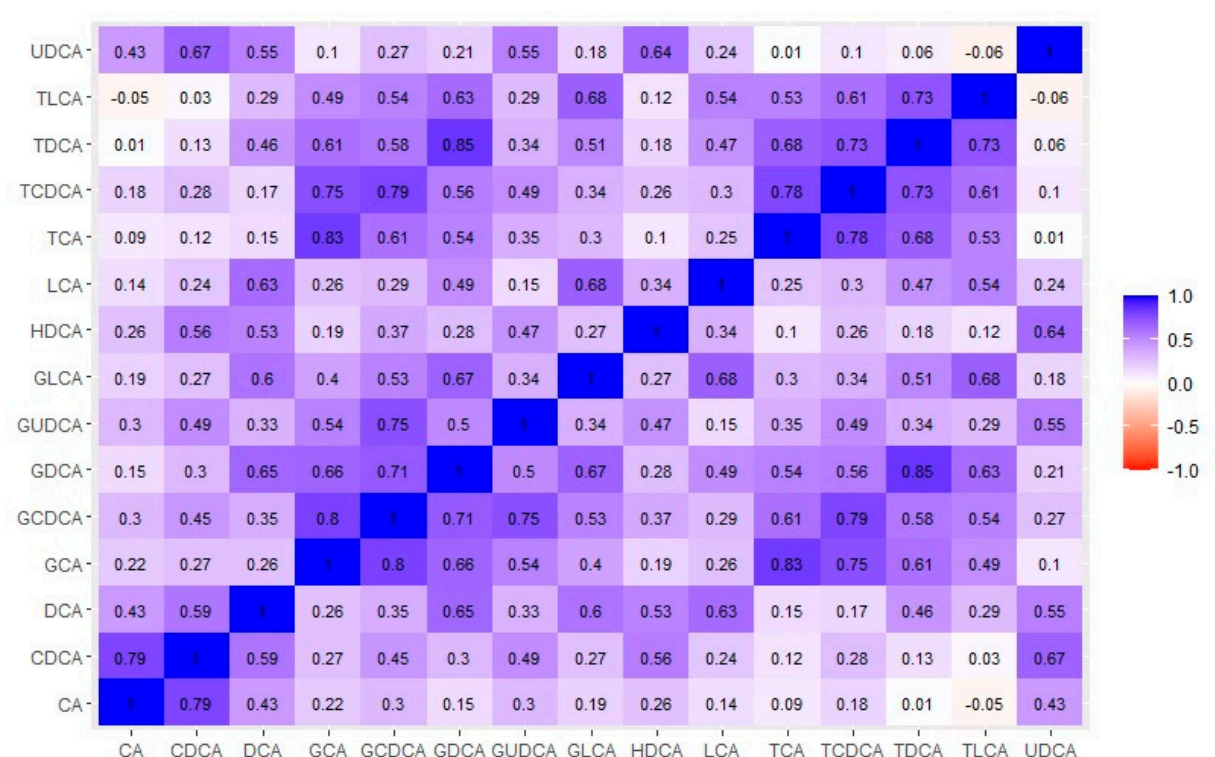

**Supplementary Figure S5.** Correlation matrix for the 15 bile acids considered in the analysis. Spearman's rank correlation coefficient is shown for each correlation. Abbreviations: CA, cholic acid; CI, confidence interval; CDCA, chenodeoxycholic acid; TCA, taurocholic acid; DCA, deoxycholic acid; GCDCA, glycochenodeoxycholic acid; GCA, glycocholic acid; GDCA, glycodeoxycholic acid; GLCA, glycolithocholic acid; GUDCA, glyoursodeoxycholic acid; HDCA, hyodeoxycholic acid; LCA, lithocholic acid; TCDCA, taurochenodeoxycholic acid; TDCA, taurodeoxycholic acid; TLCA, tauroolithocholic acid; UDCA, ursodeoxycholic acid.

**Supplementary Table S2.** Baseline concentrations of the bile acids measured in ACS patients.

| <i>Bile acids, nM</i>       | <b>Patients (N=309)</b> |
|-----------------------------|-------------------------|
| <i>Primary bile acids</i>   |                         |
| CA                          | 35.06 (14.52, 125.09)   |
| CDCA                        | 79.95 (28.32, 333.09)   |
| TCA                         | 19.54 (10.57, 46.45)    |
| <i>Secondary bile acids</i> |                         |
| DCA                         | 227.88 (109.30, 514.33) |
| GCDCA                       | 400.29 (206.65, 799.74) |
| GCA                         | 85.84 (45.17, 206.18)   |
| GDCA                        | 138.05 (56.47, 307.80)  |
| GLCA                        | 13.41 (5.35, 29.25)     |
| GUDCA                       | 38.30 (15.05, 83.01)    |
| HDCA                        | 93.97 (45.94, 202.23)   |
| LCA                         | 17.78 (8.56, 33.09)     |
| TCDCA                       | 71.23 (32.99, 149.76)   |
| TDCA                        | 22.41 (7.51, 51.12)     |
| TLCA                        | 3.53 (2.52, 5.37)       |
| UDCA                        | 14.19 (5.27, 37.01)     |

Data are presented as median (interquartile range). Abbreviations: CA, cholic acid; CI, confidence interval; CDCA, chenodeoxycholic acid; TCA, taurocholic acid; DCA, deoxycholic acid; GCDCA, glycochenodeoxycholic acid; GCA, glycocholic acid; GDCA, glycodeoxycholic acid; GLCA, glycolithocholic acid; GUDCA, glyoursodeoxycholic acid; HDCA, hyodeoxycholic acid; LCA, lithocholic acid; TCDCA, taurochenodeoxycholic acid; TDCA, taurodeoxycholic acid; TLCA, tauroolithocholic acid; UDCA, ursodeoxycholic acid.

**Supplementary Table S3.** Cox regression analysis examining the individual associations between bile acids and risk of MACE.

| Bile acids | Unadjusted model   |                |              | MV model           |                |              |
|------------|--------------------|----------------|--------------|--------------------|----------------|--------------|
|            | <i>HR (95% CI)</i> | <i>P value</i> | <i>P adj</i> | <i>HR (95% CI)</i> | <i>P value</i> | <i>P adj</i> |
| CA         | 0.94 (0.78, 1.13)  | 0.542          | 0.813        | 1.03 (0.86, 1.25)  | 0.677          | 0.820        |
| CDCA       | 1.01 (0.84, 1.20)  | 0.881          | 0.940        | 1.06 (0.88, 1.28)  | 0.491          | 0.820        |
| TCA        | 0.96 (0.81, 1.15)  | 0.724          | 0.863        | 0.96 (0.80, 1.14)  | 0.657          | 0.820        |
| DCA        | 1.08 (0.90, 1.28)  | 0.382          | 0.808        | 1.06 (0.88, 1.29)  | 0.501          | 0.820        |
| GCDCA      | 0.90 (0.76, 1.07)  | 0.264          | 0.808        | 0.91 (0.75, 1.09)  | 0.324          | 0.820        |
| GCA        | 0.99 (0.83, 1.17)  | 0.940          | 0.940        | 0.96 (0.81, 1.15)  | 0.711          | 0.820        |
| GDCA       | 0.96 (0.81, 1.14)  | 0.683          | 0.863        | 0.88 (0.73, 1.07)  | 0.227          | 0.820        |
| GLCA       | 0.93 (0.78, 1.11)  | 0.485          | 0.808        | 0.91 (0.76, 1.10)  | 0.355          | 0.820        |
| GUDCA      | 0.93 (0.78, 1.10)  | 0.403          | 0.808        | 0.96 (0.79, 1.16)  | 0.707          | 0.820        |
| HDCA       | 0.92 (0.77, 1.09)  | 0.365          | 0.808        | 0.99(0.83, 1.19)   | 0.995          | 0.995        |
| LCA        | 0.93 (0.79, 1.11)  | 0.459          | 0.808        | 0.91 (0.76, 1.08)  | 0.294          | 0.820        |
| TCDCA      | 0.86 (0.72, 1.02)  | 0.093          | 0.808        | 0.89 (0.75, 1.05)  | 0.191          | 0.820        |
| TDCA       | 0.90 (0.75, 1.07)  | 0.259          | 0.808        | 0.84 (0.70, 1.02)  | 0.082          | 0.820        |
| TLCA       | 0.90 (0.76, 1.07)  | 0.268          | 0.808        | 0.92 (0.77, 1.10)  | 0.393          | 0.820        |
| UDCA       | 0.97 (0.81, 1.15)  | 0.748          | 0.863        | 1.02 (0.85, 1.22)  | 0.786          | 0.840        |

MV adjusted for age, sex, body mass index (kg/m<sup>2</sup>), smoking, hypertension, dyslipidemia, type 2 diabetes, unstable angina, acute ST-segment elevation myocardial infarction, non-ST-segment elevation acute myocardial infarction, statin medication, beta-blockers, oral antidiabetic medication, insulin medication, diuretics, aspirin and glomerular filtration rate. Abbreviations: CA, cholic acid; CI, confidence interval; CDCA, chenodeoxycholic acid; HR, hazard ratio; TCA, taurocholic acid; DCA, deoxycholic acid; GCDCA, glycochenodeoxycholic acid; GCA, glycocholic acid; GDCA, glycodeoxycholic acid; GLCA, glycolithocholic acid; GUDCA, glyoursodeoxycholic acid; HDCA, hyodeoxycholic acid; LCA, lithocholic acid; MACE, major adverse cardiovascular event; MV, multivariable; TCDCA, taurochenodeoxycholic acid; TDCA, taurodeoxycholic acid; TLCA, tauroolithocholic acid; UDCA, ursodeoxycholic acid.

**Supplementary Table S4.** Bile acids ranked from the highest to the lowest elastic net positive and negative regression coefficients for MACE. Exposure contrast is per SD/z-score increase of the bile acid.

| <b>Bile acids</b> | <b><math>\beta</math> (95% CI)</b> | <b>Bile acids</b> | <b><math>\beta</math> (95% CI)</b> |
|-------------------|------------------------------------|-------------------|------------------------------------|
| DCA               | 0.531 (0.506, 0.555)               | CA                | -0.470 (-0.489, -0.451)            |
| CDCA              | 0.363 (0.342, 0.384)               | TDCA              | -0.412 (-0.438, -0.386)            |
| GCA               | 0.359 (0.338, 0.380)               | GCDCA             | -0.257 (-0.284, -0.229)            |
| GUDCA             | 0.040 (0.024, 0.057)               | HDCA              | -0.233 (-0.249, -0.218)            |
|                   |                                    | UDCA              | -0.123 (-0.137, -0.108)            |
|                   |                                    | LCA               | -0.102 (-0.118, -0.086)            |

Abbreviations: CA, cholic acid; CDCA, chenodeoxycholic acid; CI, confidence interval; DCA, deoxycholic acid; GCA, glycocholic acid; GCDCA, glycochenodeoxycholic acid; GUDCA, glycoursodeoxycholic acid; HDCA, hyodeoxycholic acid; LCA, lithocholic acid; MACE, major adverse cardiovascular event; TDCA, taurodeoxycholic acid; UDCA, ursodeoxycholic acid.

**Supplementary Table S5.** Cox regression analysis examining the individual associations between bile acids and all-cause mortality.

| Bile acids | Unadjusted model   |                |              | MV model           |                |              |
|------------|--------------------|----------------|--------------|--------------------|----------------|--------------|
|            | <i>HR (95% CI)</i> | <i>P value</i> | <i>P adj</i> | <i>HR (95% CI)</i> | <i>P value</i> | <i>P adj</i> |
| CA         | 1.03 (0.84, 1.27)  | 0.891          | 0.900        | 1.11(0.90, 1.38)   | 0.304          | 0.724        |
| CDCA       | 1.07 (0.86, 1.32)  | 0.518          | 0.900        | 1.19 (0.95, 1.50)  | 0.115          | 0.536        |
| TCA        | 0.97 (0.78, 1.20)  | 0.798          | 0.900        | 1.00 (0.80, 1.24)  | 0.997          | 0.997        |
| DCA        | 1.22 (0.98, 1.52)  | 0.066          | 0.900        | 1.23 (0.96, 1.59)  | 0.097          | 0.536        |
| GCDCA      | 1.07 (0.87, 1.32)  | 0.471          | 0.900        | 1.21 (0.94, 1.54)  | 0.122          | 0.536        |
| GCA        | 1.10 (0.90, 1.35)  | 0.334          | 0.900        | 1.09 (0.88, 1.35)  | 0.395          | 0.740        |
| GDCA       | 1.12 (0.91, 1.38)  | 0.268          | 0.900        | 1.07 (0.84, 1.37)  | 0.556          | 0.781        |
| GLCA       | 1.11 (0.90, 1.37)  | 0.309          | 0.900        | 1.11 (0.89, 1.39)  | 0.338          | 0.724        |
| GUDCA      | 1.07 (0.87, 1.30)  | 0.501          | 0.900        | 1.19 (0.94, 1.51)  | 0.143          | 0.536        |
| HDCA       | 0.94 (0.76, 1.16)  | 0.578          | 0.900        | 1.06 (0.85, 1.31)  | 0.581          | 0.781        |
| LCA        | 1.04 (0.84, 1.28)  | 0.711          | 0.900        | 1.05 (0.84, 1.31)  | 0.658          | 0.781        |
| TCDCa      | 0.92 (0.74, 1.13)  | 0.445          | 0.900        | 1.03 (0.83, 1.29)  | 0.734          | 0.786        |
| TDCA       | 0.98 (0.79, 1.21)  | 0.879          | 0.900        | 0.95 (0.75, 1.19)  | 0.670          | 0.781        |
| TLCA       | 0.98 (0.79, 1.22)  | 0.900          | 0.900        | 1.04 (0.83, 1.30)  | 0.677          | 0.781        |
| UDCA       | 1.03 (0.84, 1.27)  | 0.753          | 0.900        | 1.15 (0.91, 1.45)  | 0.221          | 0.663        |

MV adjusted for age, sex, body mass index (kg/m<sup>2</sup>), smoking, hypertension, dyslipidemia, type 2 diabetes, unstable angina, acute ST-segment elevation myocardial infarction, non-ST-segment elevation acute myocardial infarction, statin medication, beta-blockers, oral antidiabetic medication, insulin medication, diuretics, aspirin and glomerular filtration rate. Abbreviations: CA, cholic acid; CI, confidence interval; CDCA, chenodeoxycholic acid; HR, hazard ratio; TCA, taurocholic acid; DCA, deoxycholic acid; GCDCA, glycochenodeoxycholic acid; GCA, glycocholic acid; GDCA, glycodeoxycholic acid; GLCA, glycolithocholic acid; GUDCA, glyoursodeoxycholic acid; HDCA, hyodeoxycholic acid; LCA, lithocholic acid; MV, multivariable; TCDCa, taurochenodeoxycholic acid; TDCA, taurodeoxycholic acid; TLCA, tauroolithocholic acid; UDCA, ursodeoxycholic acid.



**Supplementary Table S6.** Bile acids ranked from the highest to the lowest elastic net positive and negative regression coefficients for all-cause mortality. Exposure contrast is per SD/z-score increase of the bile acid.

| <b>Bile acids</b> | <b><math>\beta</math> (95% CI)</b> | <b>Bile acids</b> | <b><math>\beta</math> (95% CI)</b> |
|-------------------|------------------------------------|-------------------|------------------------------------|
| DCA               | 0.432 (0.412, 0.452)               | CA                | -0.315 (-0.331, -0.299)            |
| GCA               | 0.335 (0.314, 0.355)               | HDCA              | -0.282 (-0.300, -0.265)            |

Abbreviations: CA, cholic acid; CI, confidence interval; DCA, deoxycholic acid; GCA, glycocholic acid; HDCA, hyodeoxycholic acid.
